# Supplementary material for: Metallic VS2/graphene heterostructure as an ultra-high rate and high-specific capacity anode material for Li/Na-ion batteries
Source: Royal Society of Chemistry journal article supplement (doi:10.1039/d1cp02243a), 2021-01-01
Supplement: d1cp02243a1.pdf [file d1cp02243a1.pdf]

## Supporting Information

### **Metallic VS<sub>2</sub>/graphene heterostructure as an ultra-high rate and high-specific capacity anode material for Li/Na-ion batteries**

Bo Liu,<sup>a\*</sup> Tianyu Gao,<sup>a</sup> Peiguang Liao,<sup>a</sup> Yufeng Wen,<sup>a</sup> Mingjia Yao,<sup>b</sup> Siqi Shi,<sup>b,c\*</sup> and Wenqing Zhang<sup>d</sup>

<sup>a</sup>College of Mathematics and Physics, Jinggangshan University, Ji'an, Jiangxi 343009, China

<sup>b</sup>Materials Genome Institute, Shanghai University, Shanghai 200444, China

<sup>c</sup>School of Materials Science and Engineering, Shanghai University, Shanghai 200444, China

<sup>d</sup>Department of Physics and Shenzhen Institute for Quantum Science & Technology, Southern University of Science  
and Technology, Shenzhen, Guangdong 518055, China

\*E-mail: Bo Liu(liubo@jgsu.edu.cn), Siqi Shi (sqshi@shu.edu.cn)

**Table S1.** Two different phases with the same  $VS_2$  formula and their total energies (in eV/f.u.)

|                                                                                   |                                                                                   |                                                                                     |
|-----------------------------------------------------------------------------------|-----------------------------------------------------------------------------------|-------------------------------------------------------------------------------------|
| 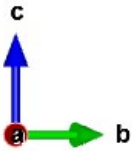 |  |  |
| Phase                                                                             | 1T                                                                                | 2H                                                                                  |
| Total energy(eV/f.u.)                                                             | -20.318                                                                           | -20.337                                                                             |

**Table S2.** Two different stacking patterns with the same  $VS_2$ /Graphene formula and their total energies (in eV/f.u.)

|                                                                                     |                                                                                     |                                                                                       |
|-------------------------------------------------------------------------------------|-------------------------------------------------------------------------------------|---------------------------------------------------------------------------------------|
| 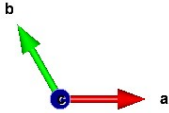 |  |   |
|  |  |  |
| Stacking patterns                                                                   | AA                                                                                  | AB                                                                                    |
| Total energy(eV/f.u.)                                                               | -36.229                                                                             | -36.261                                                                               |

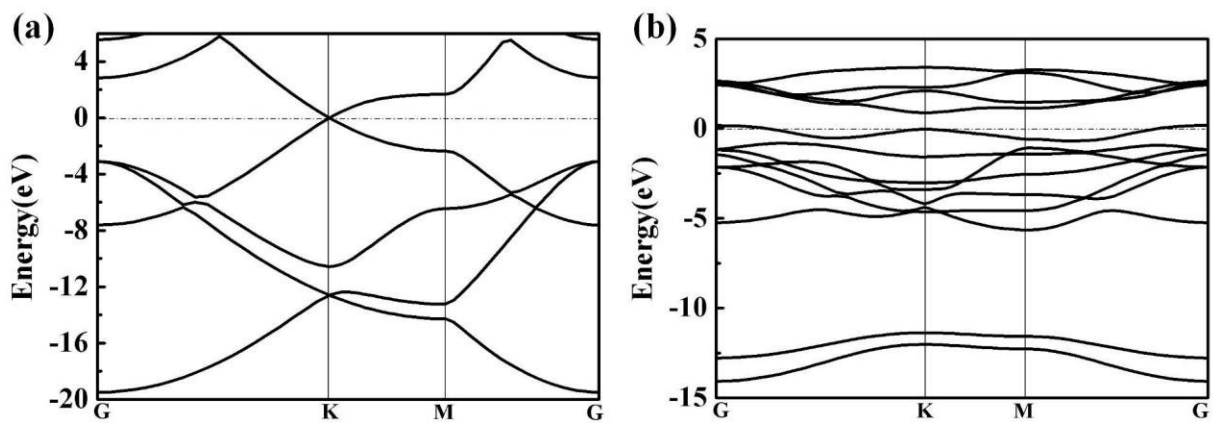

**Figure S1.** Calculated band structure of (a) graphene and (b) VS<sub>2</sub>. The Fermi level is set to 0 eV, and is indicated with a black dotted line.

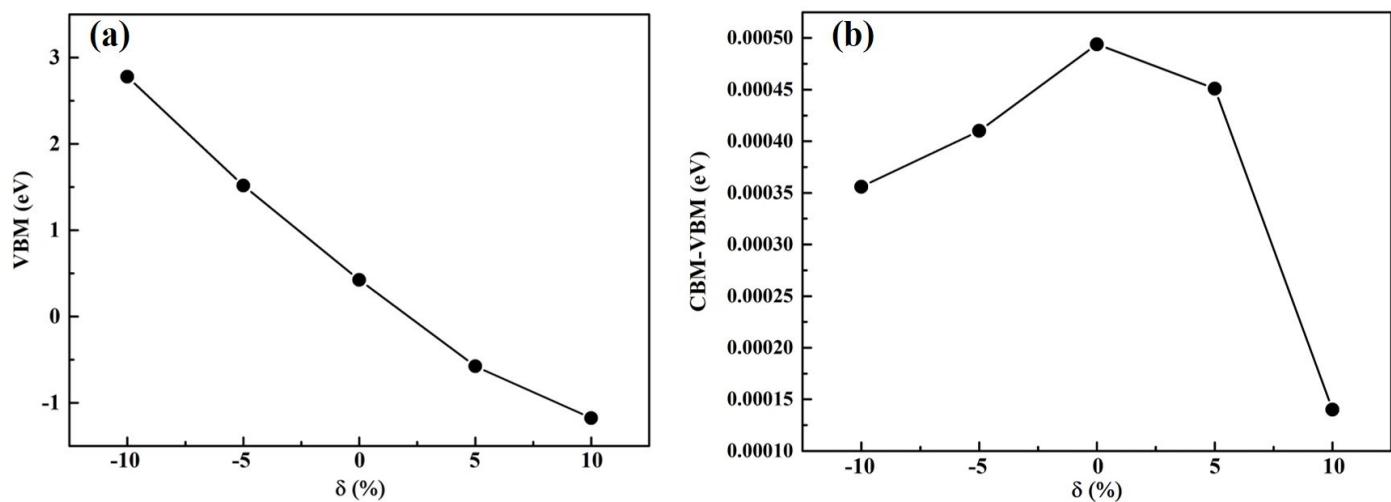

**Figure S2.** Evolution of the VBM and CBM-VBM value as a function of the tensile or compressive strain ( $\delta$ ), taking the origin at the lowest energy configuration.

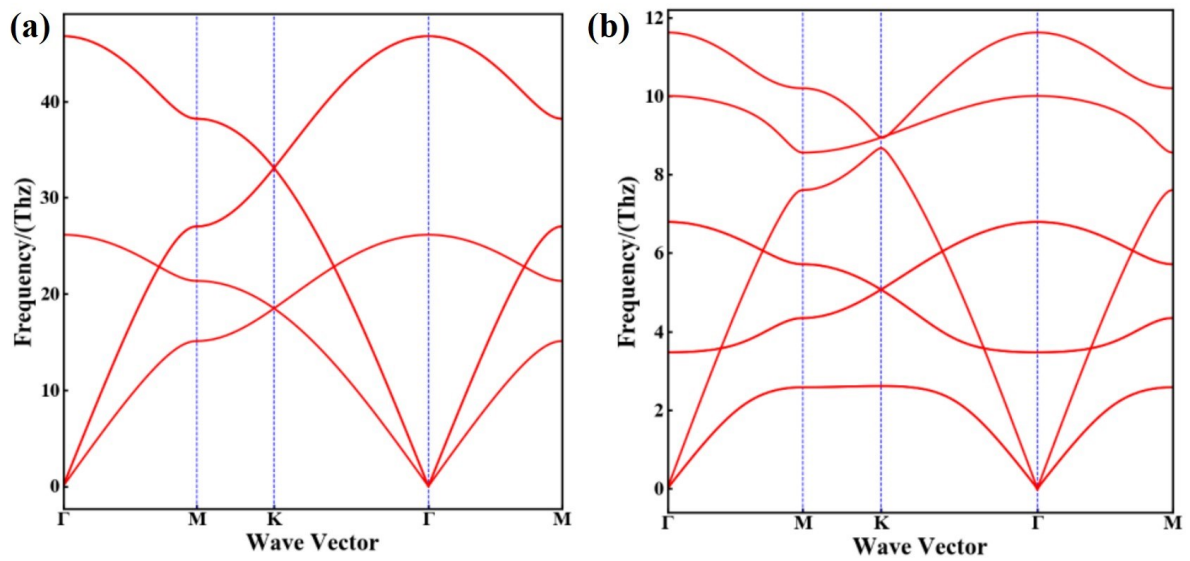

**Figure S3.** Calculated phonon dispersion curves for the structures of (a) graphene and (b) VS<sub>2</sub> monolayer.

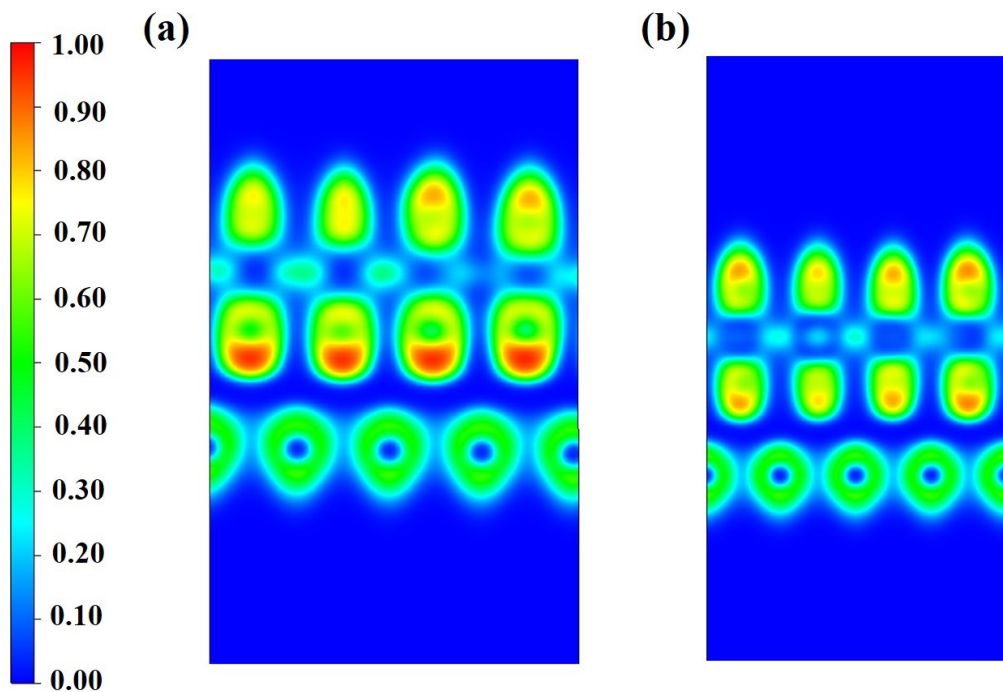

**Figure S4.** Electron localization functions of the (100) slice of VS<sub>2</sub>/Graphene system with the stable (a) Li and (b) Na adsorption site.

**Table S3.** Diffusion distances, energy barriers, and diffusion coefficients at 300 K for Li/Na Migration in the VS<sub>2</sub>/Graphene heterostructure.

| Path                              | Diffusion distance | Energy barriers (eV) | Diffusion coefficients (cm <sup>2</sup> /s) |
|-----------------------------------|--------------------|----------------------|---------------------------------------------|
| Li@I <sub>T</sub> -I <sub>T</sub> | 2.98               | 0.03                 | 2.78×10 <sup>-3</sup>                       |
| Li@T <sub>V</sub> -T <sub>V</sub> | 3.14               | 0.15                 | 2.98×10 <sup>-5</sup>                       |
| Li@H <sub>C</sub> -H <sub>C</sub> | 2.86               | 0.53                 | 1.02×10 <sup>-11</sup>                      |
| Na@I <sub>C</sub> -I <sub>C</sub> | 4.54               | 0.37                 | 1.25×10 <sup>-8</sup>                       |
| Na@T <sub>T</sub> -T <sub>T</sub> | 3.31               | 0.08                 | 4.96×10 <sup>-4</sup>                       |
| Na@H <sub>C</sub> -H <sub>C</sub> | 3.19               | 0.36                 | 9.12×10 <sup>-9</sup>                       |
